# Supplementary material for: Carbon Assimilation Strategies in Ultrabasic Groundwater: Clues from the Integrated Study of a Serpentinization-Influenced Aquifer
Source: PubMed Central journal article supplement (PMC7065513; doi:10.1128/msystems.00607-19), 2020-03-10
Supplement: mSystems.00607-19-sf003.pdf [file mSystems.00607-19-sf003.pdf]

# Metagenomes

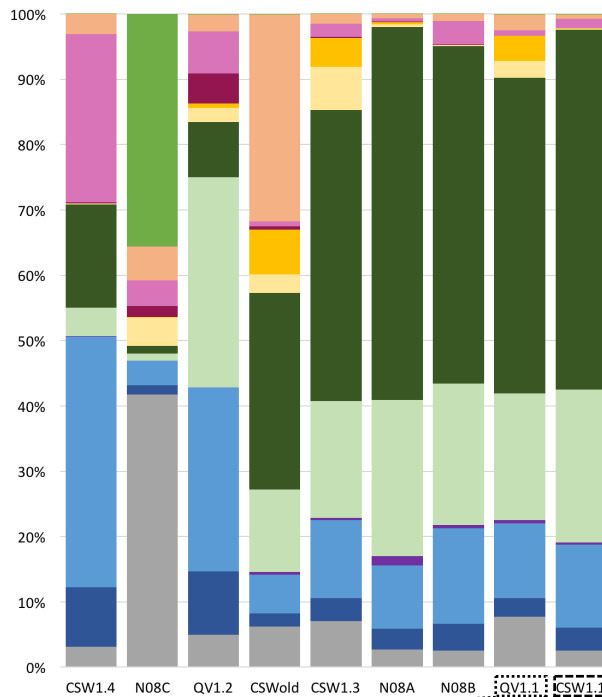

# Metatranscriptomes

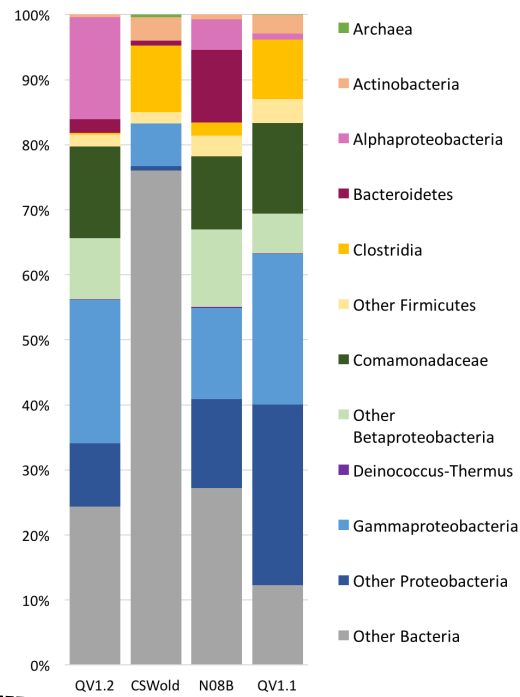

- Archaea
- Actinobacteria
- Alphaproteobacteria
- Bacteroidetes
- Clostridia
- Other Firmicutes
- Comamonadaceae
- Other Betaproteobacteria
- Deinococcus-Thermus
- Gamma proteobacteria
- Other Proteobacteria
- Other Bacteria

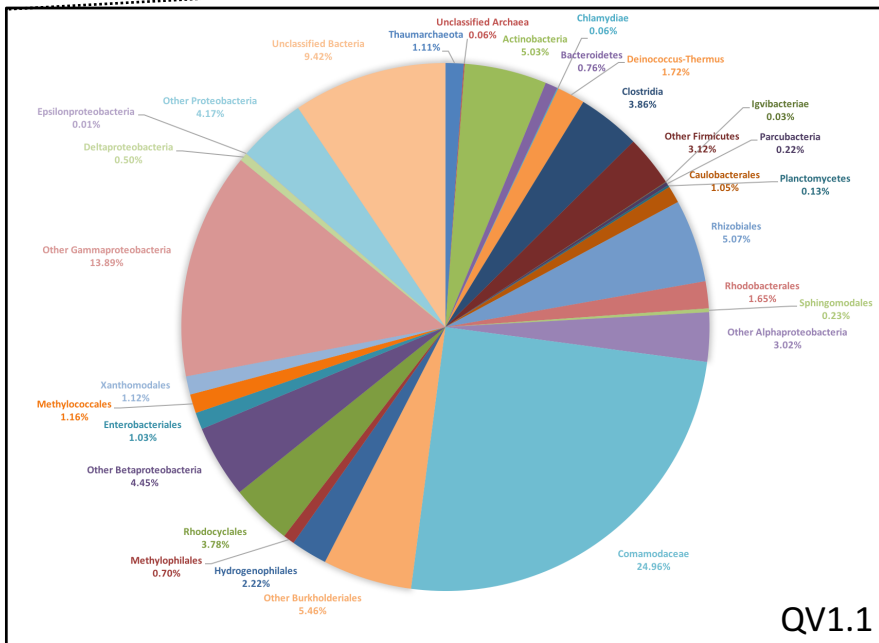

QV1.1

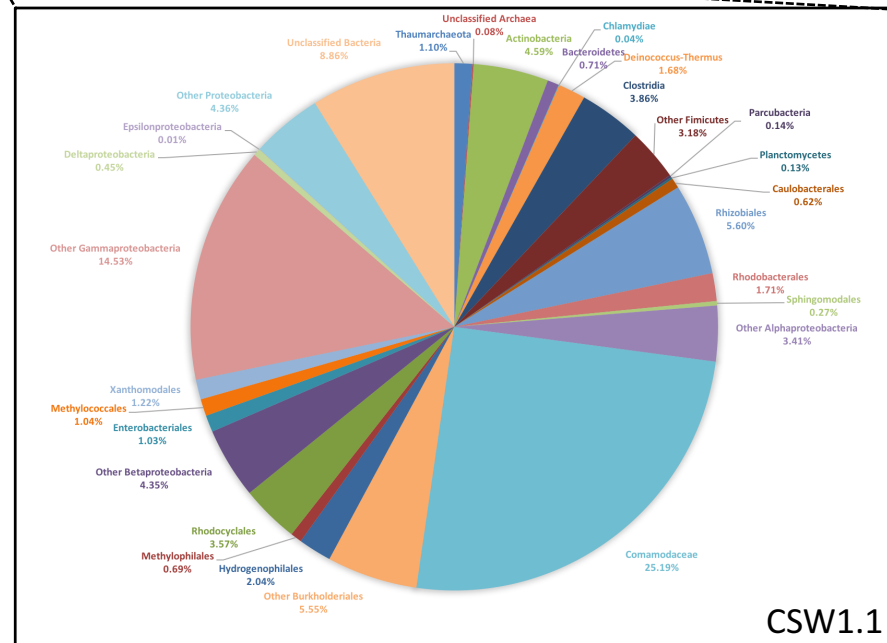

CSW1.1
