# Supplementary material for: Carbon Assimilation Strategies in Ultrabasic Groundwater: Clues from the Integrated Study of a Serpentinization-Influenced Aquifer
Source: PubMed Central journal article supplement (PMC7065513; doi:10.1128/msystems.00607-19), 2020-03-10

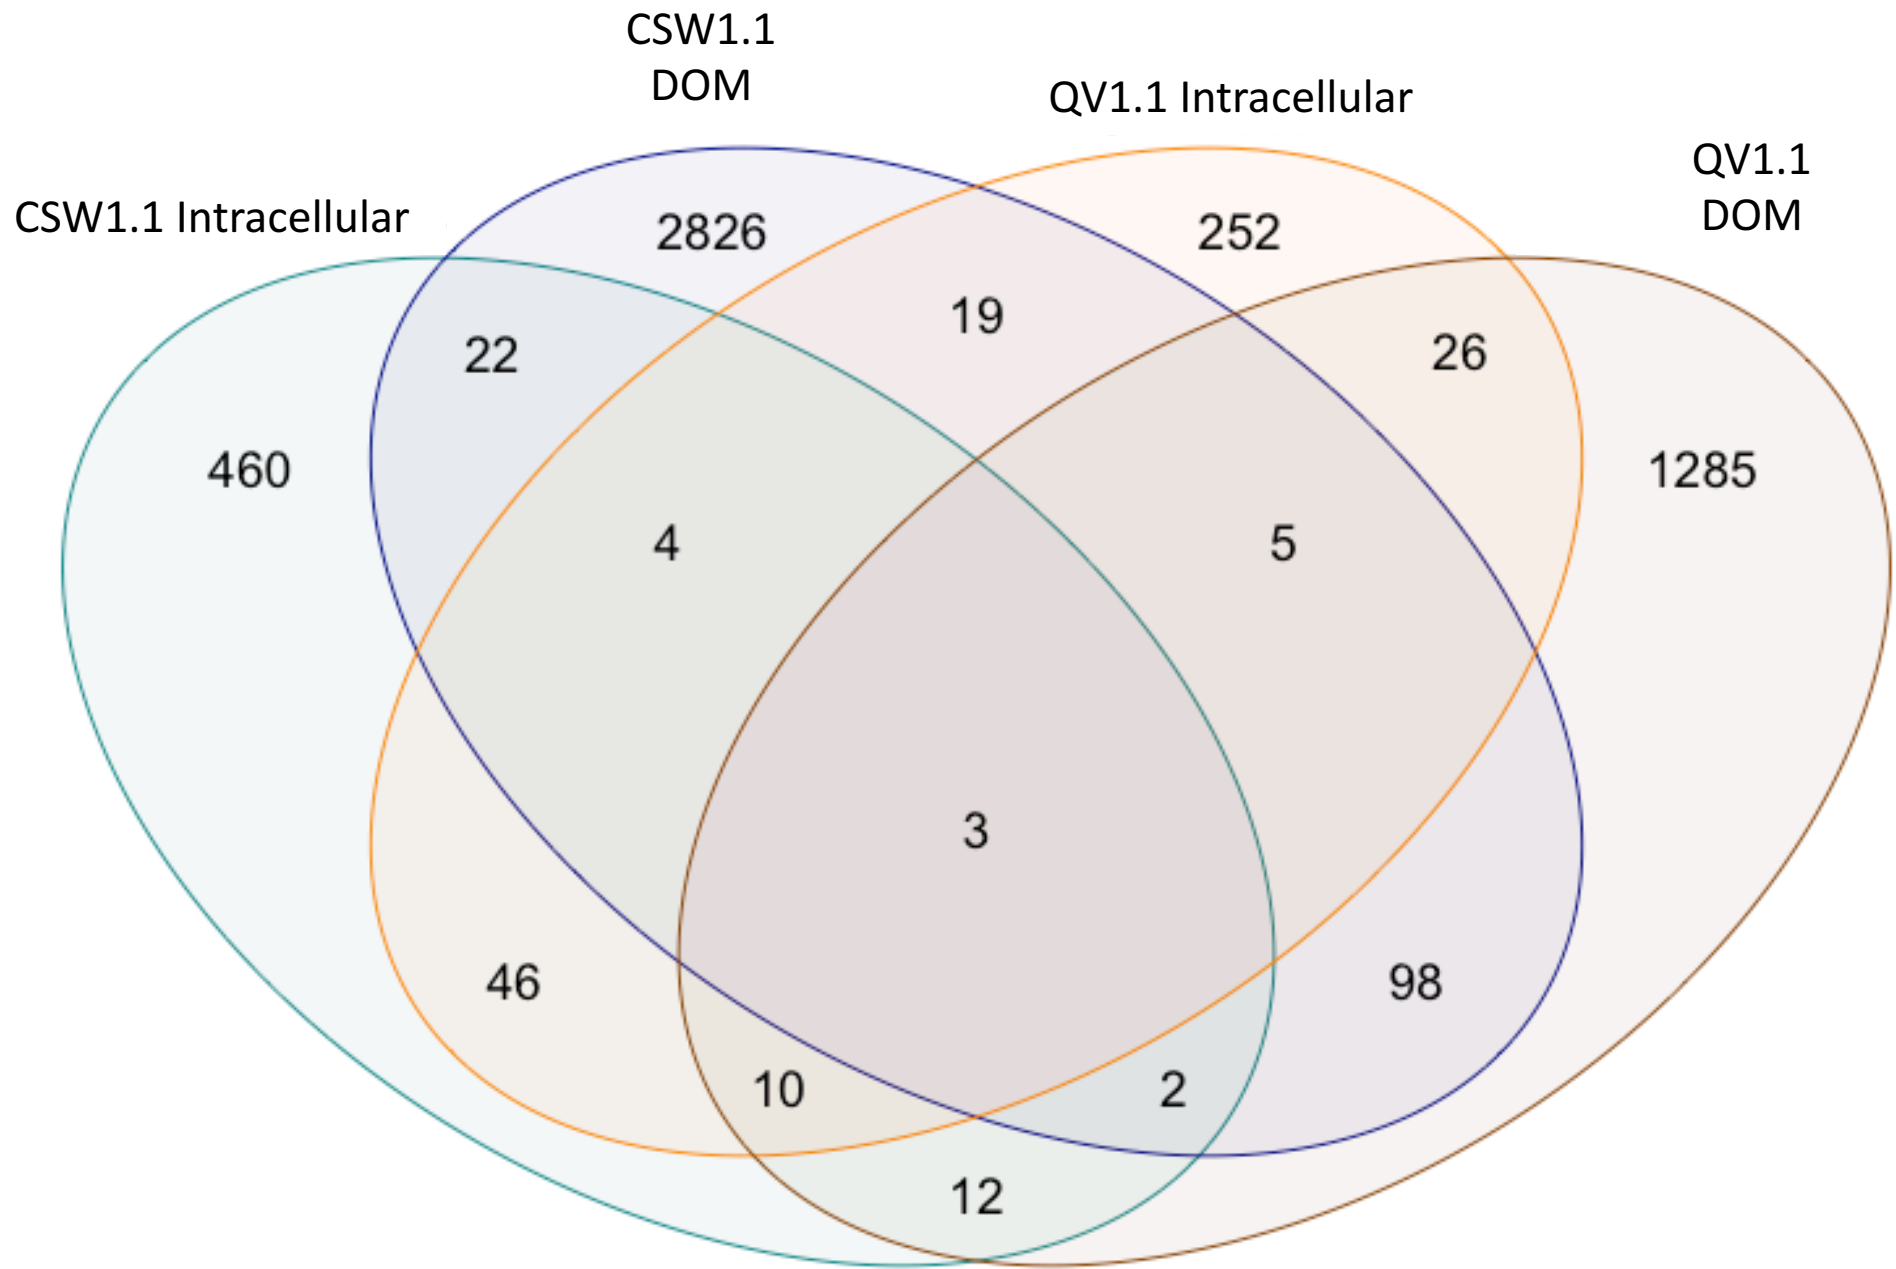

Supplement: mSystems.00607-19-sf004.pdf [file mSystems.00607-19-sf004.pdf]
